# Supplementary material for: Commonness and ecology, but not bigger brains, predict urban living in birds
Source: PubMed Central journal article supplement (PMC4412207; doi:10.1186/s12898-015-0044-x), 2015-04-11

Additional file 4

Commonness and ecology, but not bigger brains, predict urban living in birds  
Svein Dale, Jan T. Lifjeld and Melissa Rowe

Figure S2. Maximum clade credibility tree illustrating the evolutionary relationships of the 90 species included in the study of urbanization in Oslo (see main text for details of tree construction).

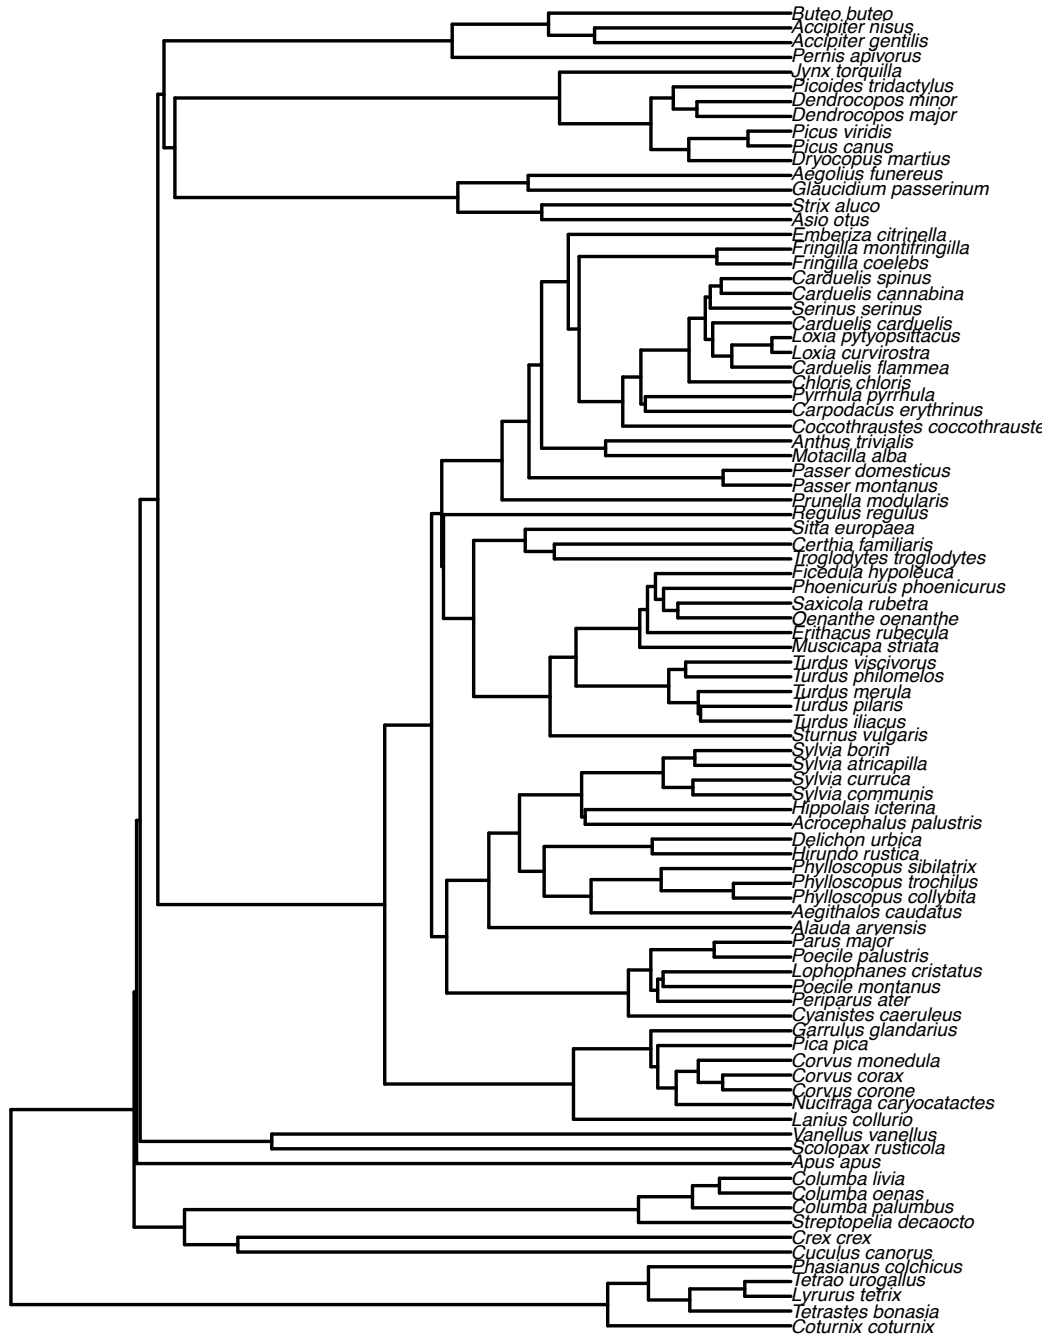

Supplement: 12898_2015_44_MOESM4_ESM.pdf [file 12898_2015_44_MOESM4_ESM.pdf]
